# Supplementary material
Source: PubMed Central journal article supplement (PMC2666577)
Supplement: M807517200_1.pdf [file M807517200_1.pdf]

Supplementary Figure 1

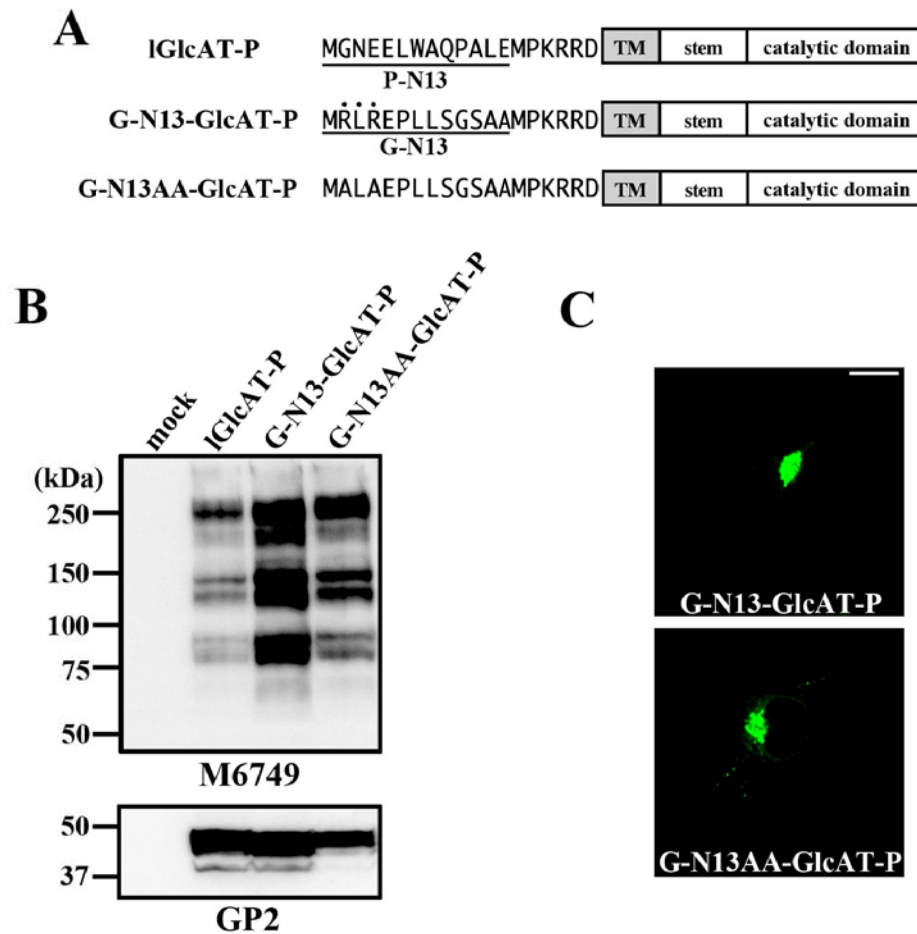

Supplementary Fig. 1. Mutant G-N13-GlcAT-P lacking the first dibasic motif near the N-terminus. (A) Schematic diagrams of chimeric GlcAT-P are shown. A dibasic motif in G-N13 is indicated by dots. G-N13AA-GlcAT-P lacks the dibasic motif near the N-terminus. (B) Neuro2A cells were transfected with the IGlcAT-P, G-N13-GlcAT-P, or G-N13AA-GlcAT-P expression plasmid, or the empty vector (mock). Cells were lysed and Western blotted with M6749 mAb (upper panel) or GP2 pAb (lower panel). (C) Neuro2A cells expressing G-N13-GlcAT-P or G-N13AA-GlcAT-P were immunostained with GP2 pAb. Bar: 10  $\mu$ m.
